# Supplementary material for: TRIM44 is indispensable for glioma cell proliferation and cell cycle progression through AKT/p21/p27 signaling pathway
Source: Springer Nature journal article supplement (doi:10.1007/s11060-019-03301-0), 2019-10-11
Supplement: MOESM2 [file 17264724]

## Sheet: Sheet1
Supplementary Table 1 Specific quantitative primers used in this study
Primer name	Forward primer	Reverse primer
TRIM44	5’-AGCGAATTTGACCCCGAAATAG-3’	5’-CGGAATCTTTGCTTCTCAGTTCT-3’
18S	5’-GTAACCCGTTGAACCCCATT-3’	5’-CCATCCAATCGGTAGTAGCG-3’
CDKN1A(P21)	5’-TGTCCGTCAGAACCCATGC-3’	5’-AAAGTCGAAGTTCCATCGCTC-3’
CDKN1B (P27)	5’-GTCGGACAGCCAGACGGGGTTAGCG-3’	5’-GGCCAGGCTTCTTGGGCGTCTGCTC-3’
CCNB1(cyclinB1)	5’-TTGGGGACATTGGTAACAAAGTC-3’	5’-ATAGGCTCAGGCGAAAGTTTTT-3’
CCND1 (cyclinD1)	5’-CTGATTCTCGGTGTGGCCTT-3’	5’-GTGTGTTGGGGGCGTATGTA-3’
U5	5’-AGCTTGCCTTGAGTGCTTCA-3’	5’-TGACTAAAAGGGTCTGAGGG-3’
MMP2	5’-CCCACTGCGGTTTTCTCGAAT-3’	5’-CAAAGGGGTATCCATCGCCAT-3’
MMP9	5’-AGACCTGGGCAGATTCCAAAC-3’	5’-CGGCAAGTCTTCCGAGTAGT-3’
Vimentin	5’-AGTCCACTGAGTACCGGAGAC-3’	5’-CATTTCACGCATCTGGCGTTC-3’
Snail1	5’-GCTGCAGGACTCTAATCCAGAGTT-3’	5’-GACAGAGTCCCAGATGAGCATTG-3’
